# Supplementary material for: Novel 4,6-Disubstituted s-Triazin-2-yl Amino Acid Derivatives as Promising Antifungal Agents
Source: MDPI journal article supplement (doi:10.3390/jof6040237), 2020-10-21

# Supporting Information

## Novel 4,6-Disubstituted s-Triazin-2-yl Amino Acid Derivatives as Promising Antifungal Agents

Rakia Abd Alhameed, Zainab Almarhoon, Essam N. Sholkamy, Salman Ali Khan, Zaheer Ul-Haq, Anamika Sharma, Beatriz G. de la Torre, Fernando Albericio,\* Ayman El-Faham\*

### Table of Content

|                   |                                                                   |
|-------------------|-------------------------------------------------------------------|
| <b>Figure S1</b>  | <sup>1</sup> H-NMR and <sup>13</sup> C-NMR for compound <b>5a</b> |
| <b>Figure S2</b>  | <sup>1</sup> H-NMR and <sup>13</sup> C-NMR for compound <b>5b</b> |
| <b>Figure S3</b>  | <sup>1</sup> H-NMR and <sup>13</sup> C-NMR for compound <b>5c</b> |
| <b>Figure S4</b>  | <sup>1</sup> H-NMR and <sup>13</sup> C-NMR for compound <b>5d</b> |
| <b>Figure S5</b>  | <sup>1</sup> H-NMR and <sup>13</sup> C-NMR for compound <b>5e</b> |
| <b>Figure S6</b>  | <sup>1</sup> H-NMR and <sup>13</sup> C-NMR for compound <b>5f</b> |
| <b>Figure S7</b>  | <sup>1</sup> H-NMR and <sup>13</sup> C-NMR for compound <b>5g</b> |
| <b>Figure S8</b>  | <sup>1</sup> H-NMR and <sup>13</sup> C-NMR for compound <b>5h</b> |
| <b>Figure S9</b>  | <sup>1</sup> H-NMR and <sup>13</sup> C-NMR for compound <b>5i</b> |
| <b>Figure S10</b> | <sup>1</sup> H-NMR and <sup>13</sup> C-NMR for compound <b>5j</b> |
| <b>Figure S11</b> | <sup>1</sup> H-NMR and <sup>13</sup> C-NMR for compound <b>5k</b> |
| <b>Figure S12</b> | <sup>1</sup> H-NMR and <sup>13</sup> C-NMR for compound <b>5l</b> |
| <b>Figure S13</b> | <sup>1</sup> H-NMR and <sup>13</sup> C-NMR for compound <b>5m</b> |
| <b>Figure S14</b> | <sup>1</sup> H-NMR and <sup>13</sup> C-NMR for compound <b>5n</b> |
| <b>Figure S15</b> | <sup>1</sup> H-NMR and <sup>13</sup> C-NMR for compound <b>5o</b> |
| <b>Figure S16</b> | <sup>1</sup> H-NMR and <sup>13</sup> C-NMR for compound <b>5p</b> |
| <b>Figure S17</b> | <sup>1</sup> H-NMR and <sup>13</sup> C-NMR for compound <b>5q</b> |

Figure S1

$^1\text{H}$ -NMR and  $^{13}\text{C}$ -NMR for compound 5a

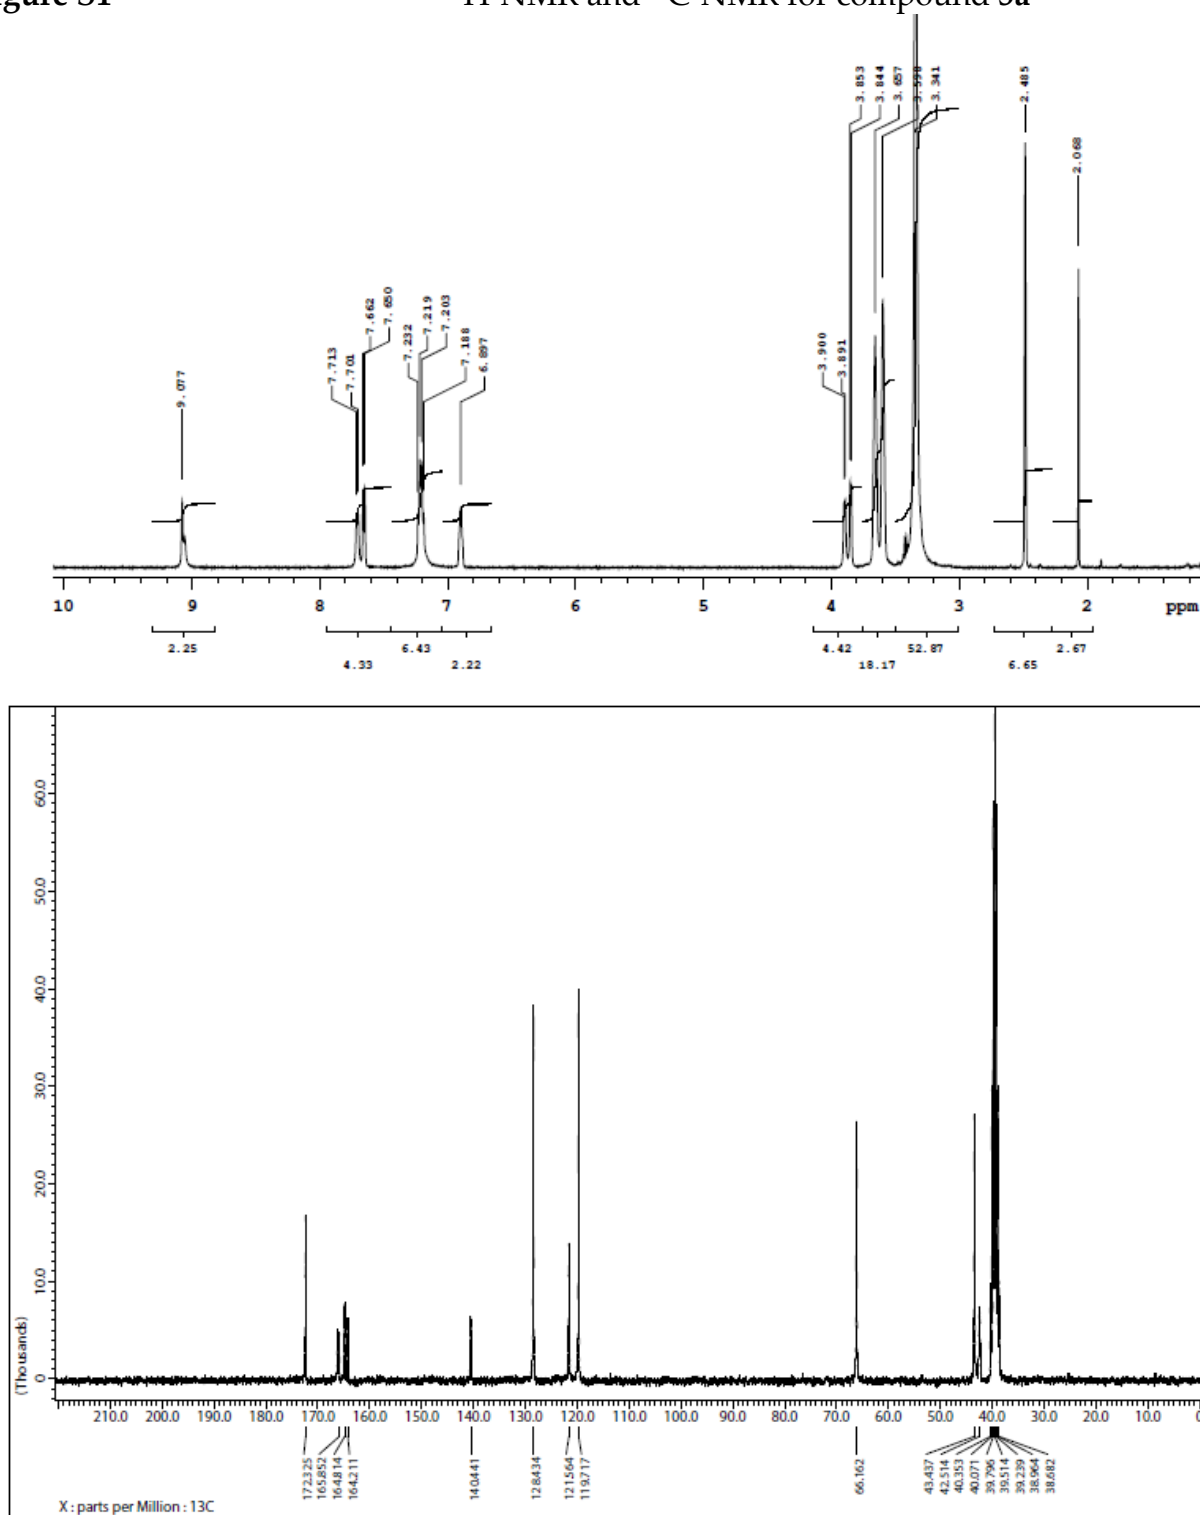

Figure S2

$^1\text{H}$ -NMR and  $^{13}\text{C}$ -NMR for compound **5b**

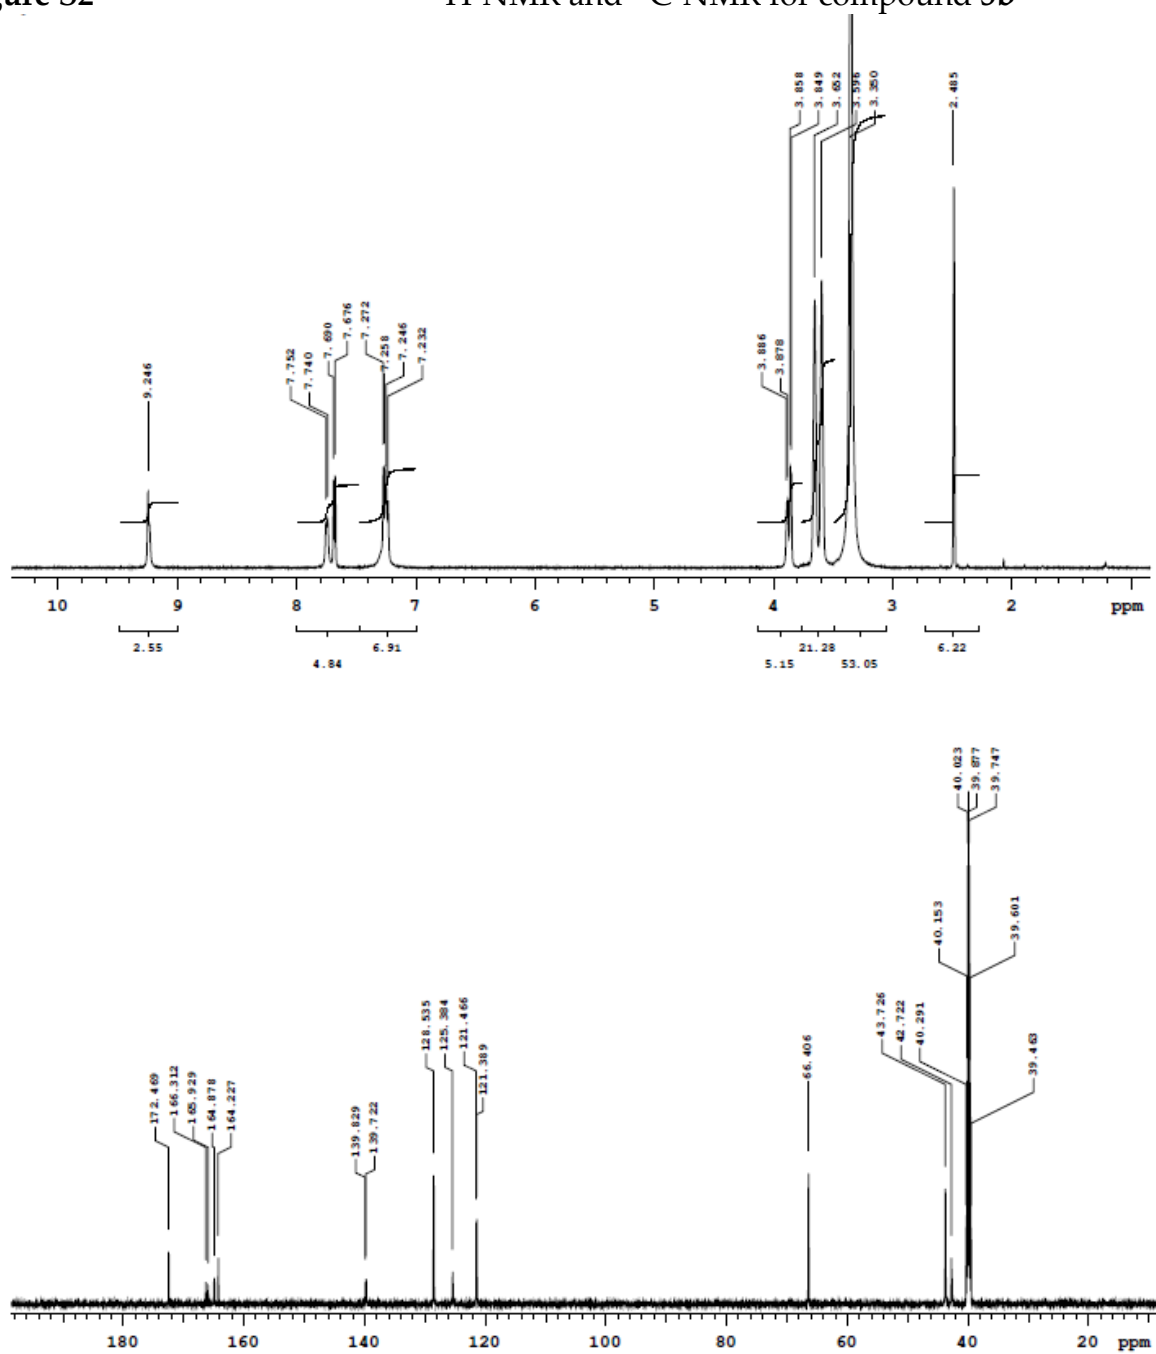

Figure S3

$^1\text{H}$ -NMR and  $^{13}\text{C}$ -NMR for compound 5c

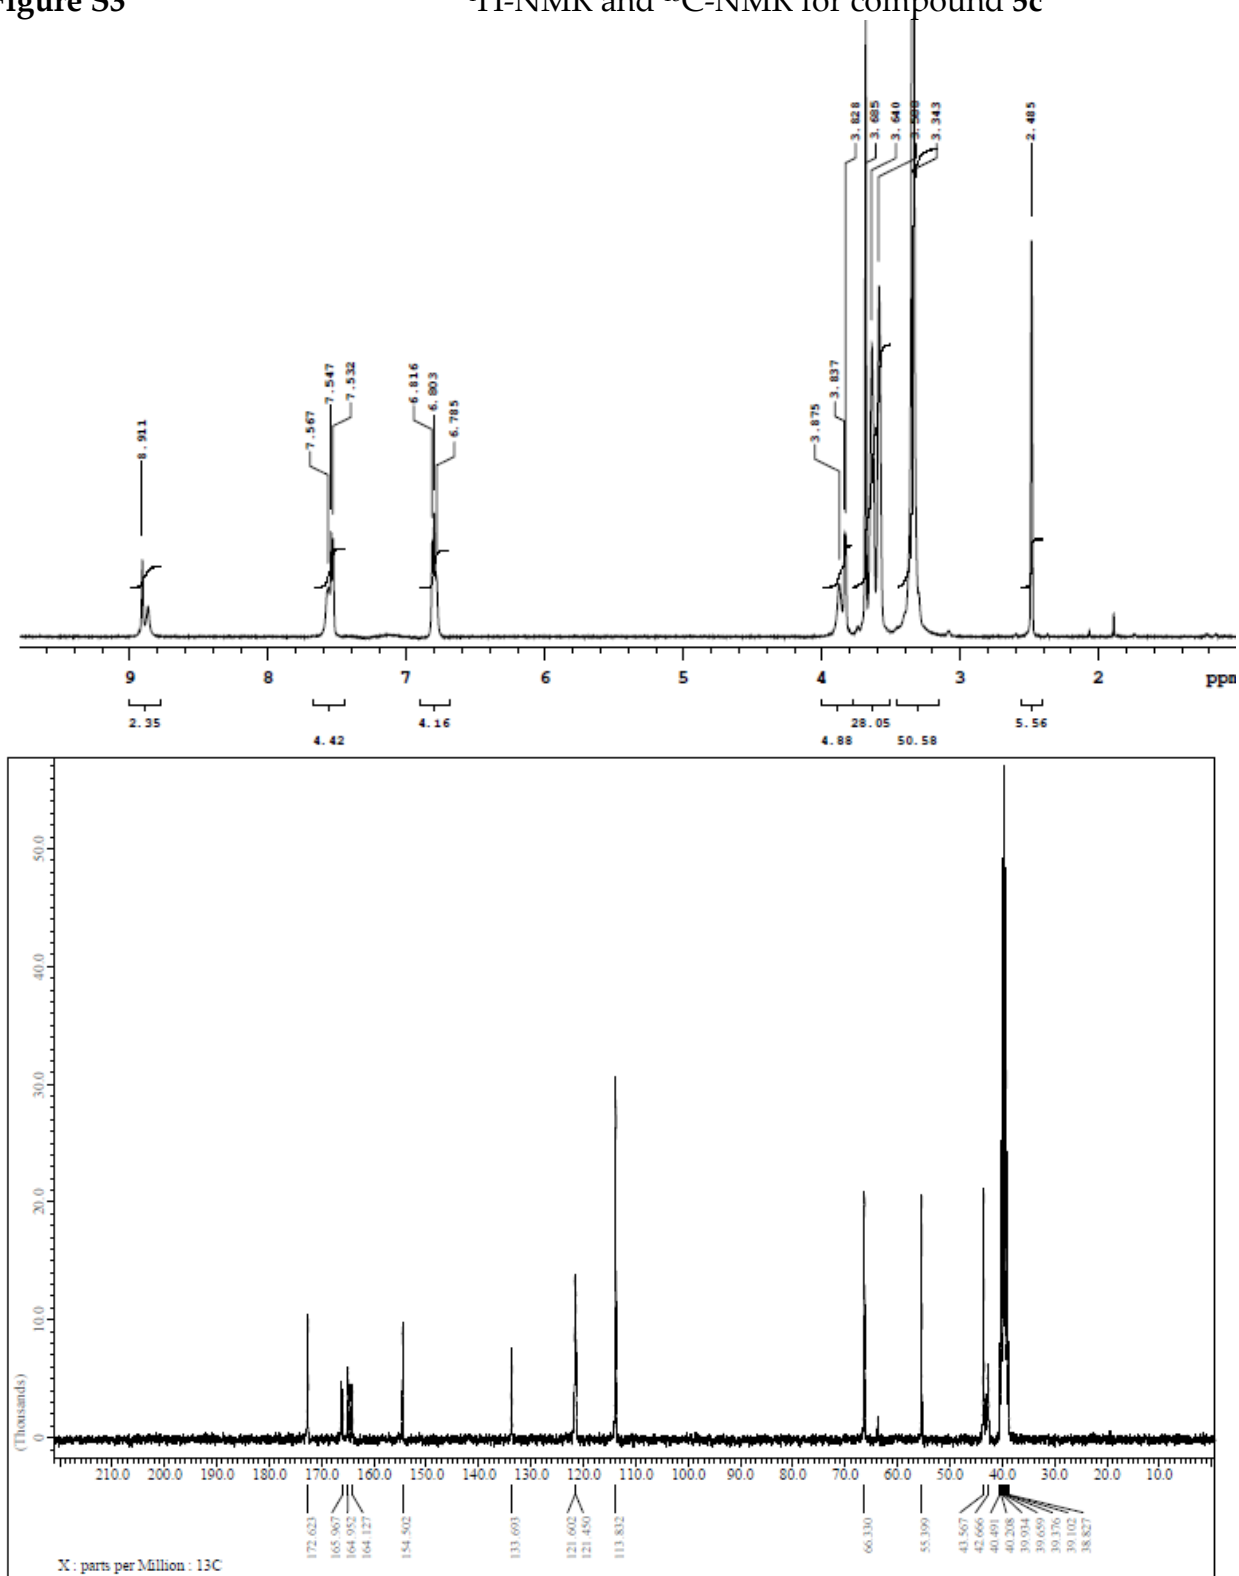

**Figure S4**

$^1\text{H}$ -NMR and  $^{13}\text{C}$ -NMR for compound **5d**

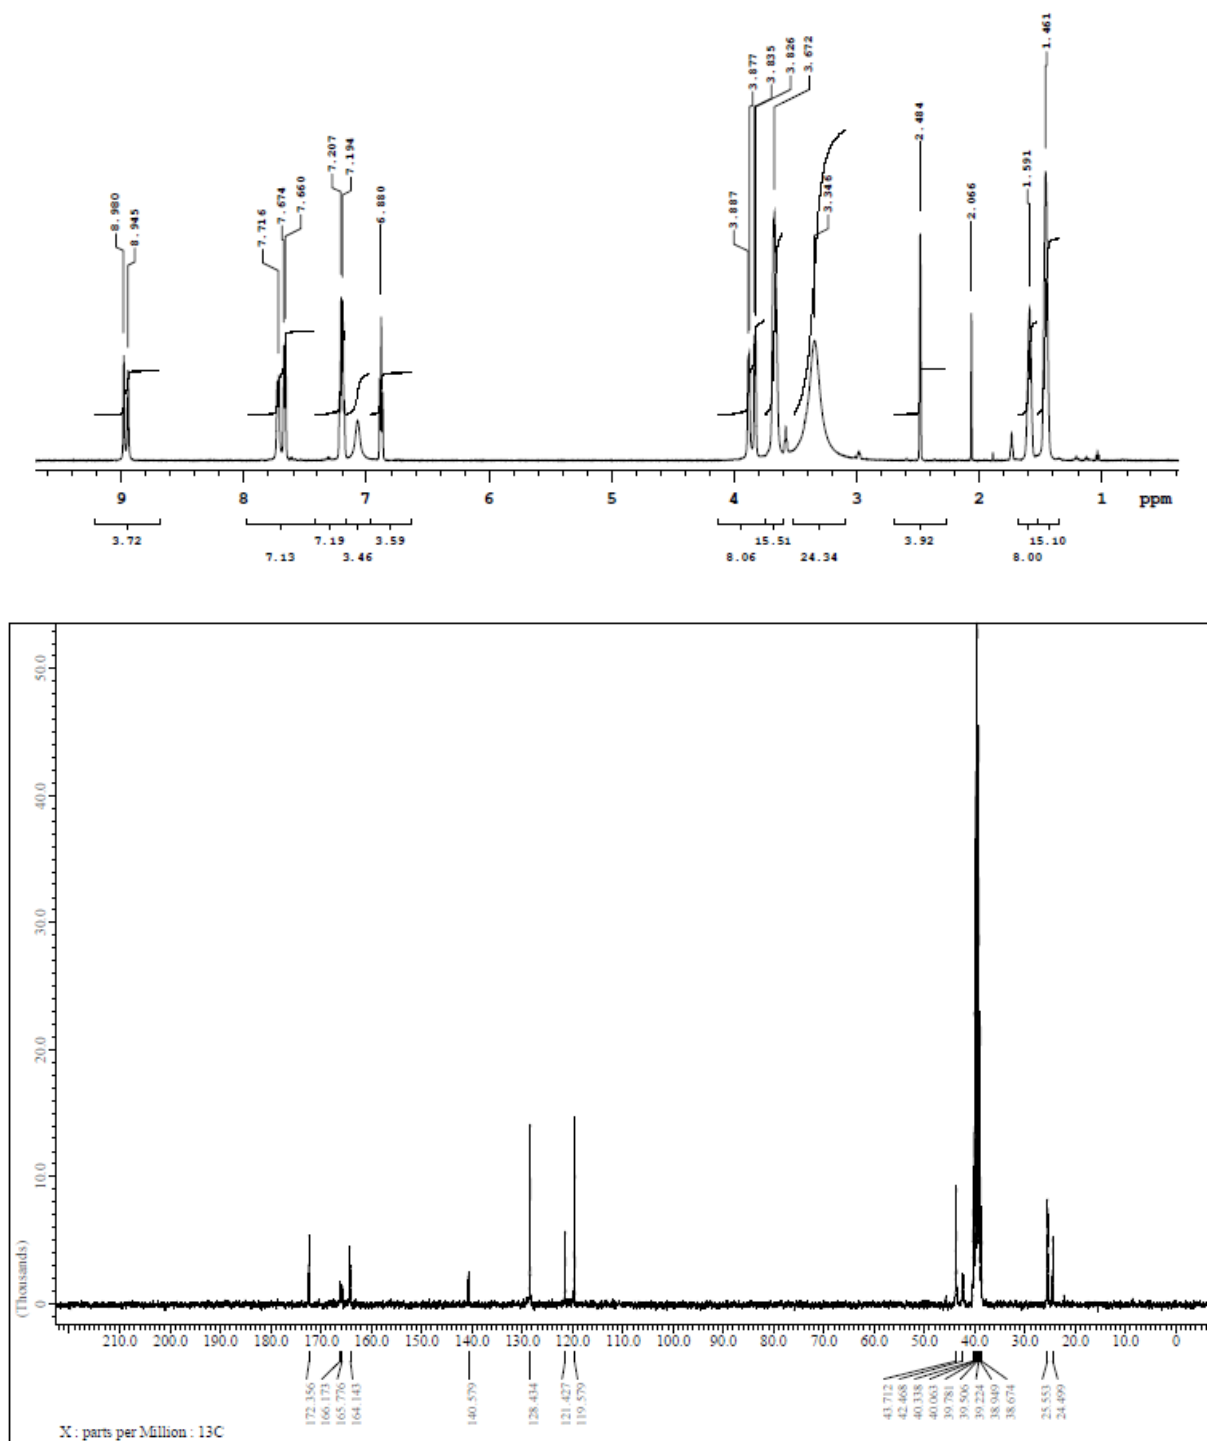

Figure S5

$^1\text{H}$ -NMR and  $^{13}\text{C}$ -NMR for compound 5e

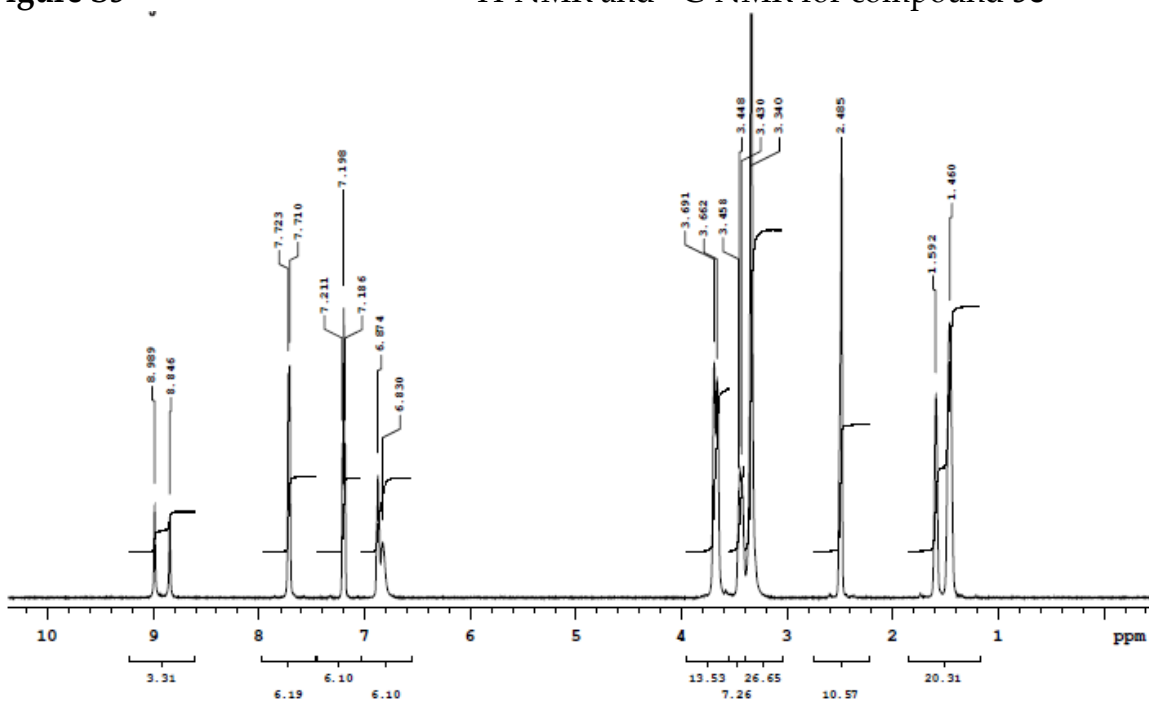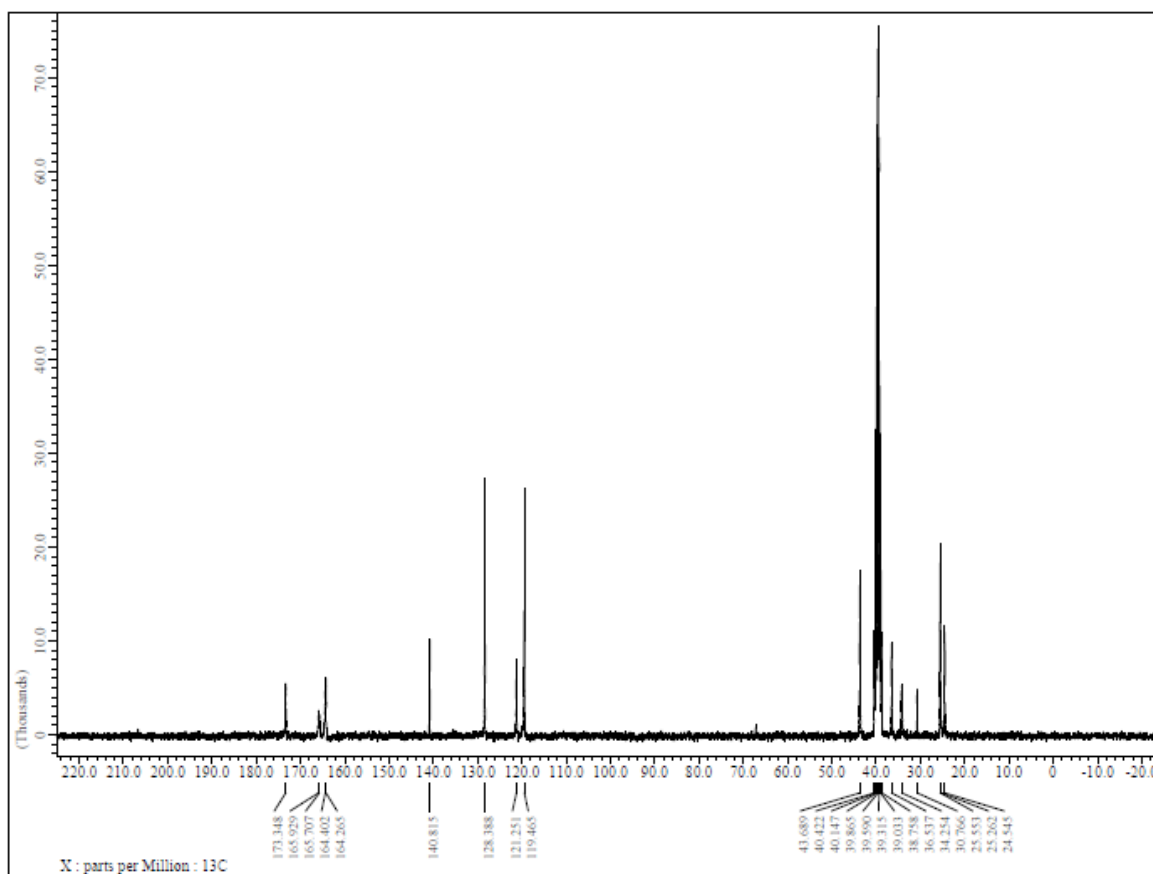

Figure S6

$^1\text{H}$ -NMR and  $^{13}\text{C}$ -NMR for compound 5f

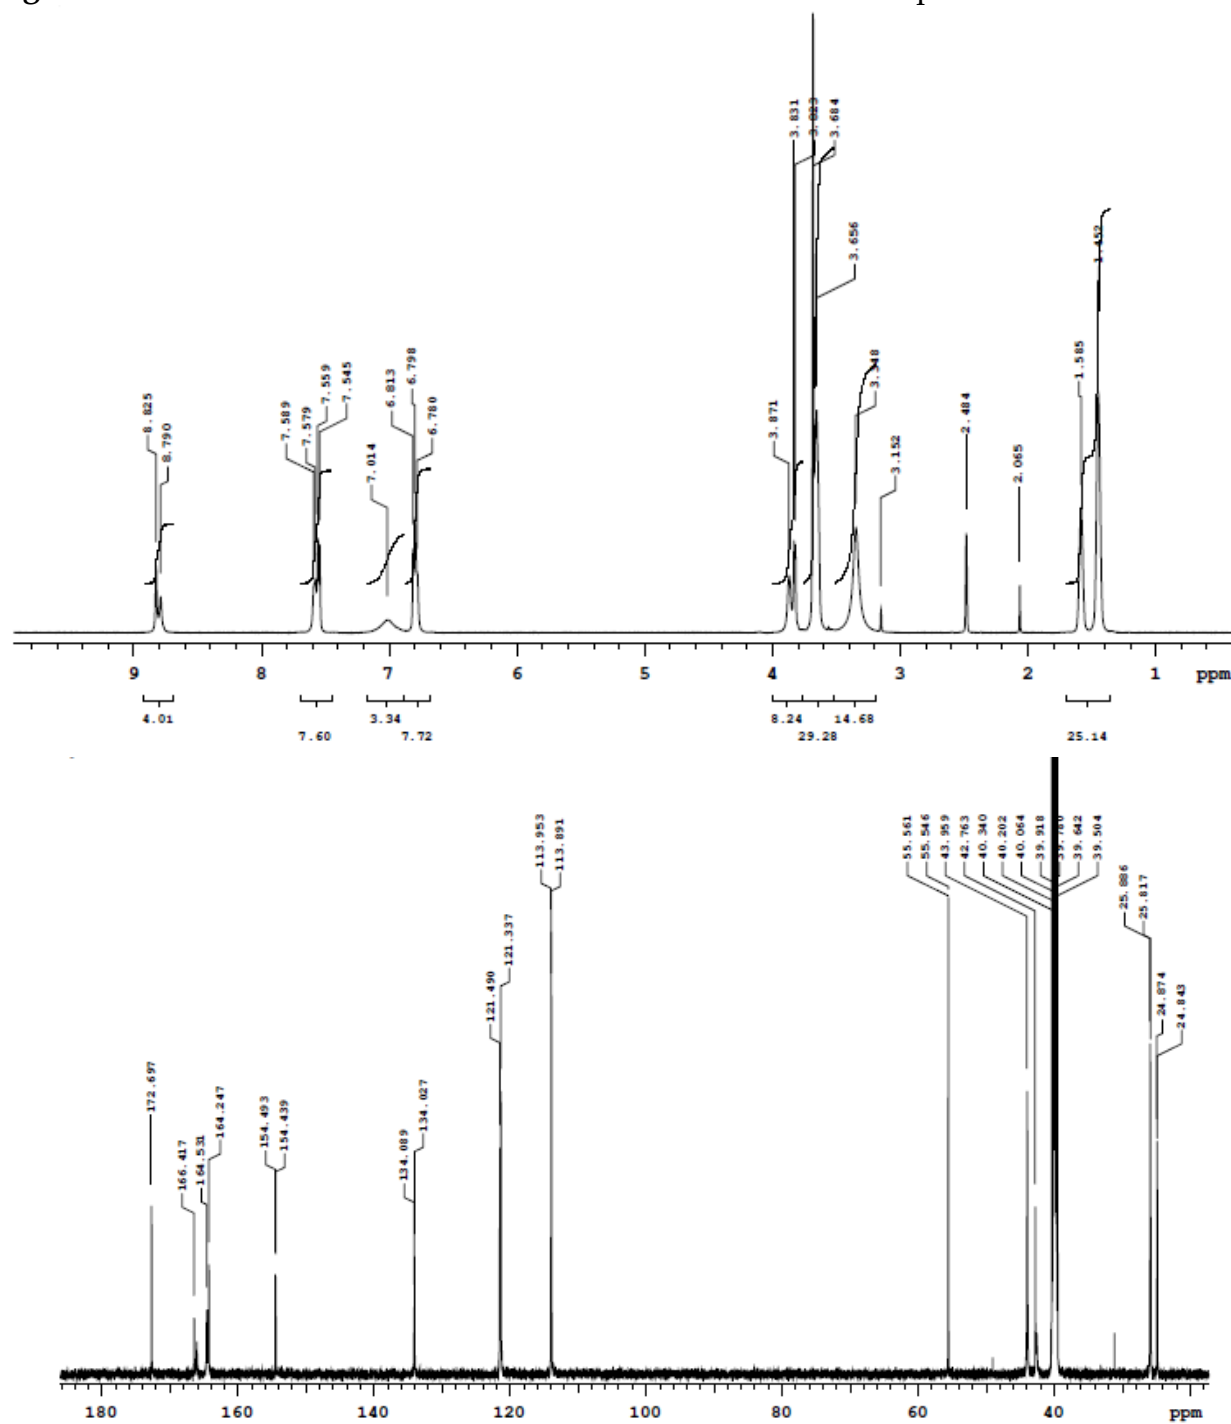

Figure S7

$^1\text{H}$ -NMR and  $^{13}\text{C}$ -NMR for compound **5g**

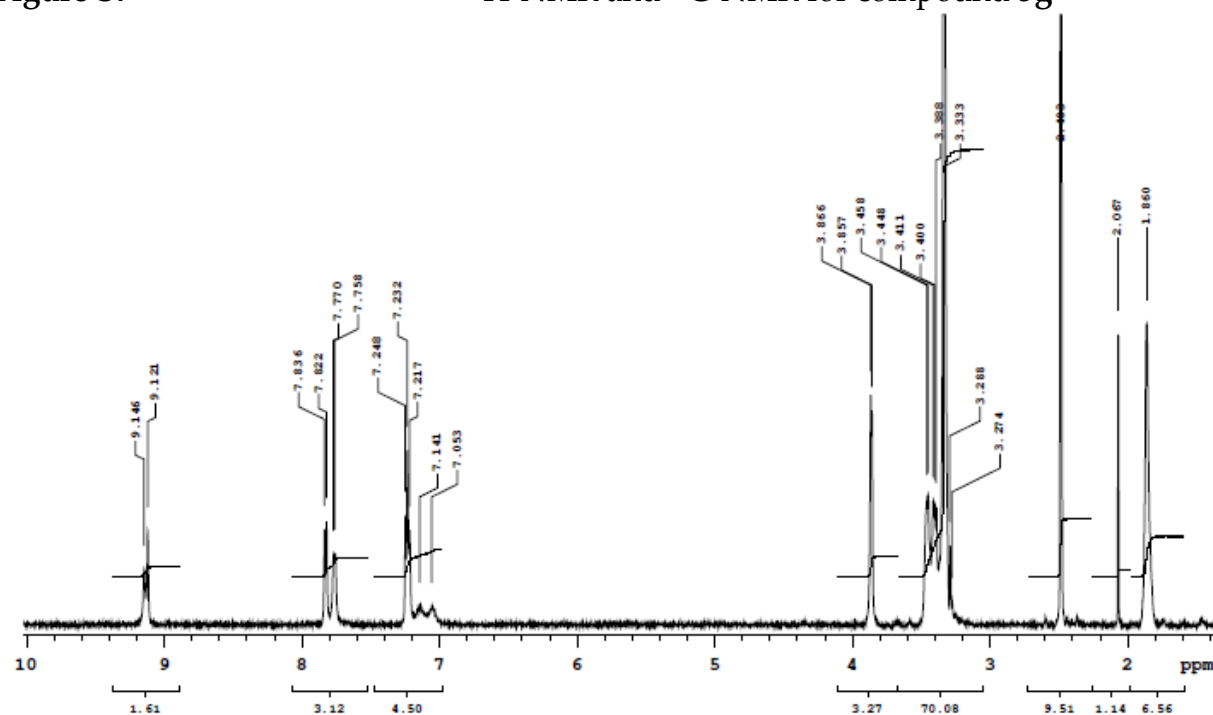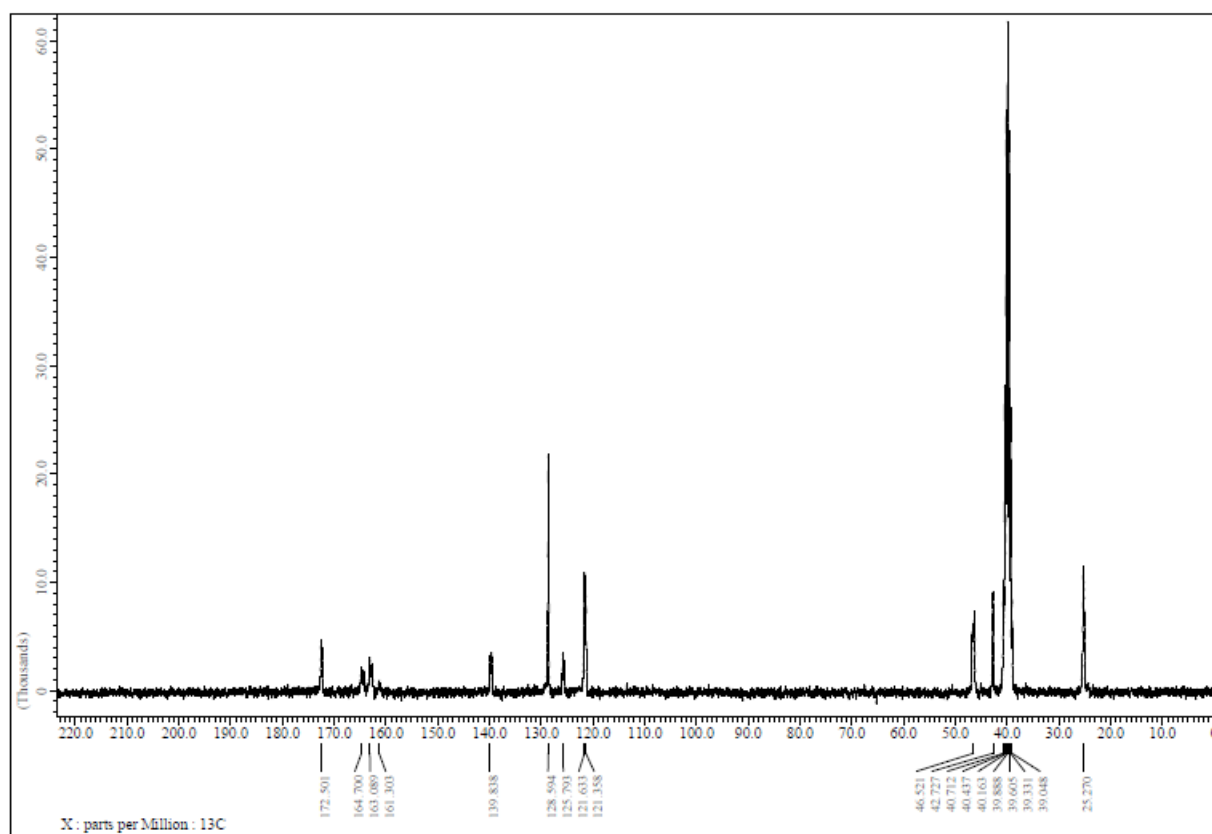



Figure S8

$^1\text{H}$ -NMR and  $^{13}\text{C}$ -NMR for compound **5h**

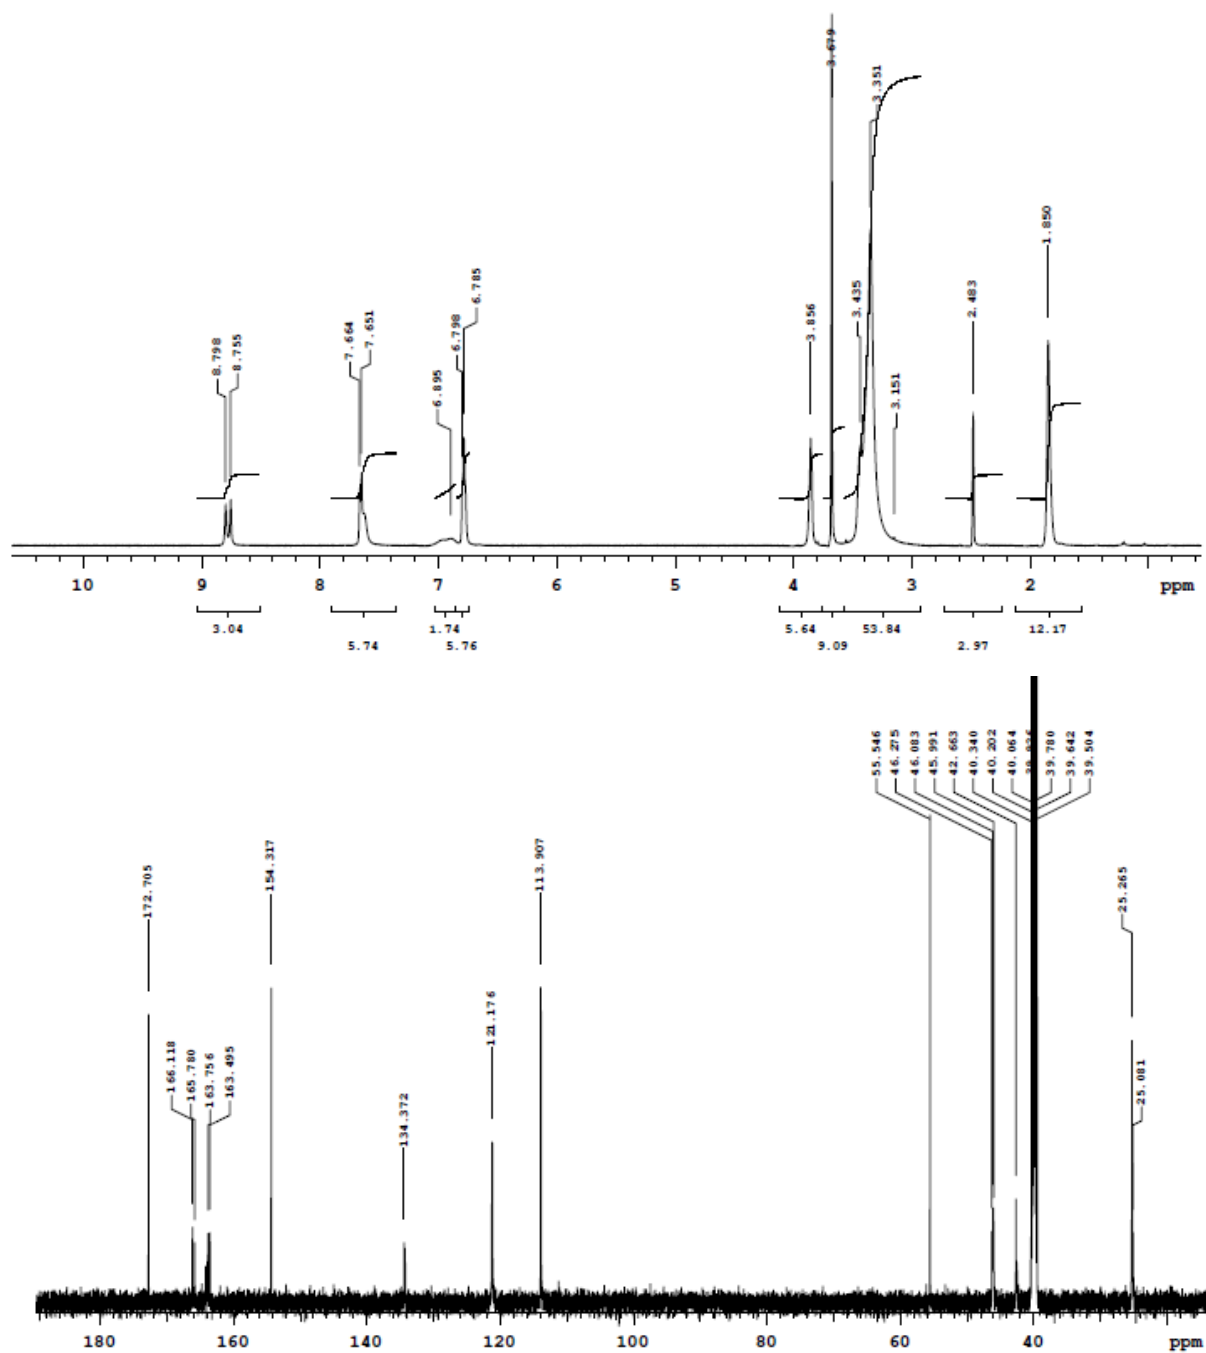

Figure S9

$^1\text{H}$ -NMR and  $^{13}\text{C}$ -NMR for compound **5i**

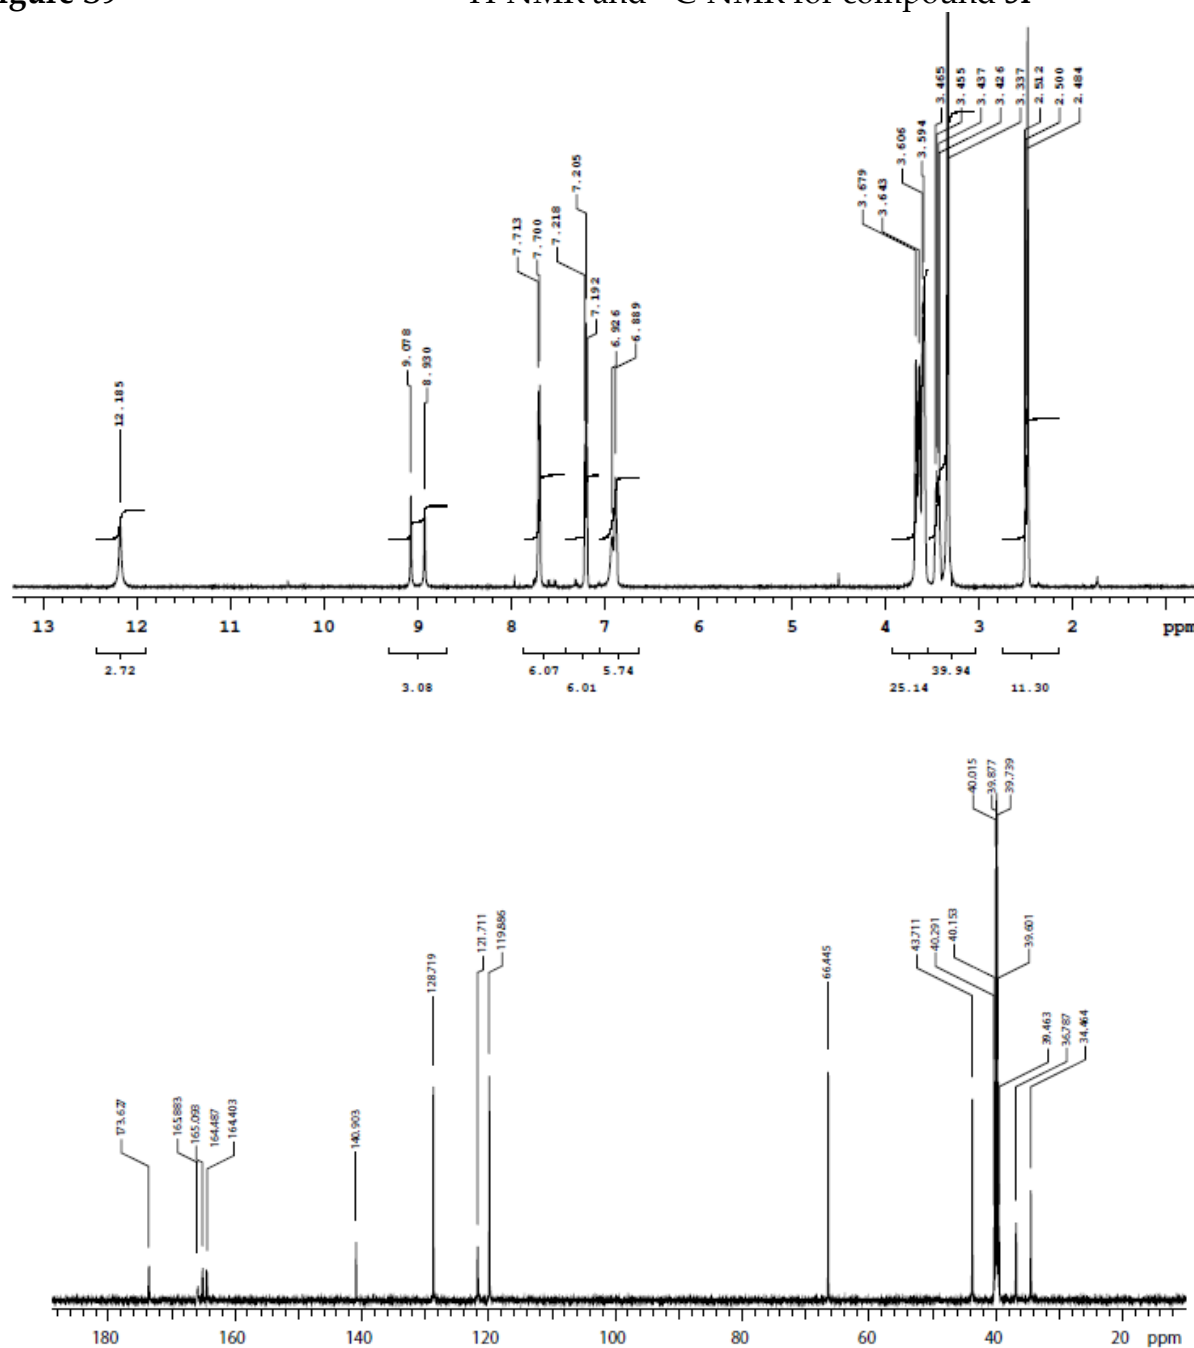

Figure S10

$^1\text{H}$ -NMR and  $^{13}\text{C}$ -NMR for compound 5j

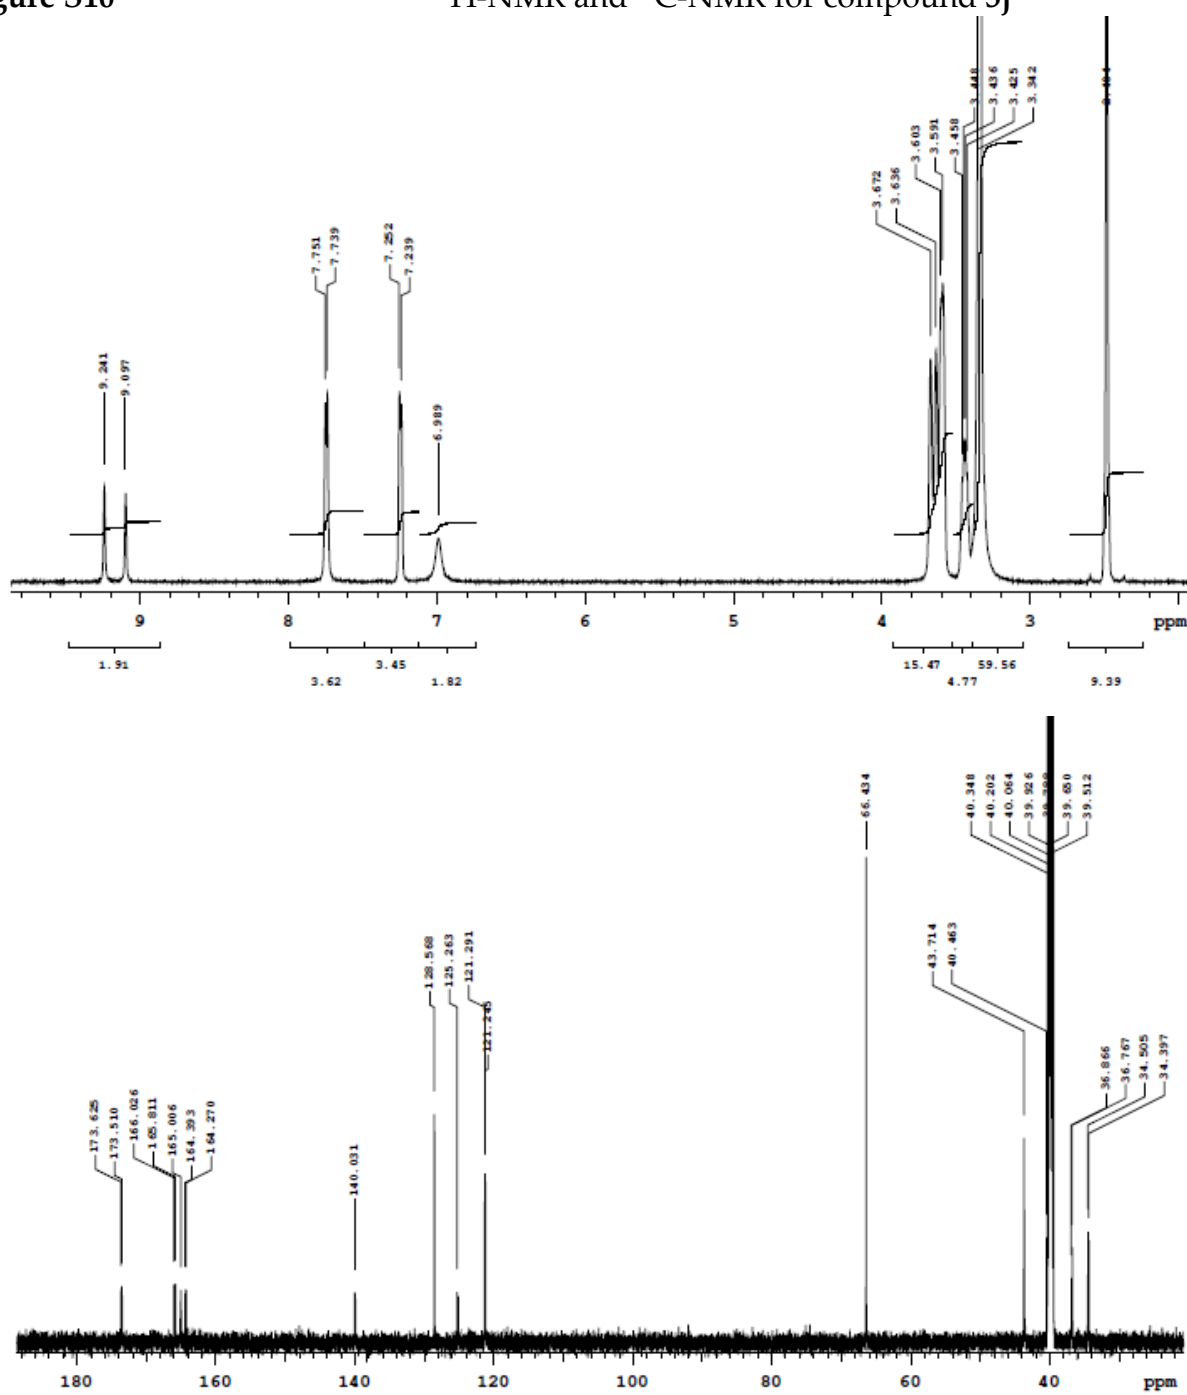

Figure S11

$^1\text{H}$ -NMR and  $^{13}\text{C}$ -NMR for compound 5k

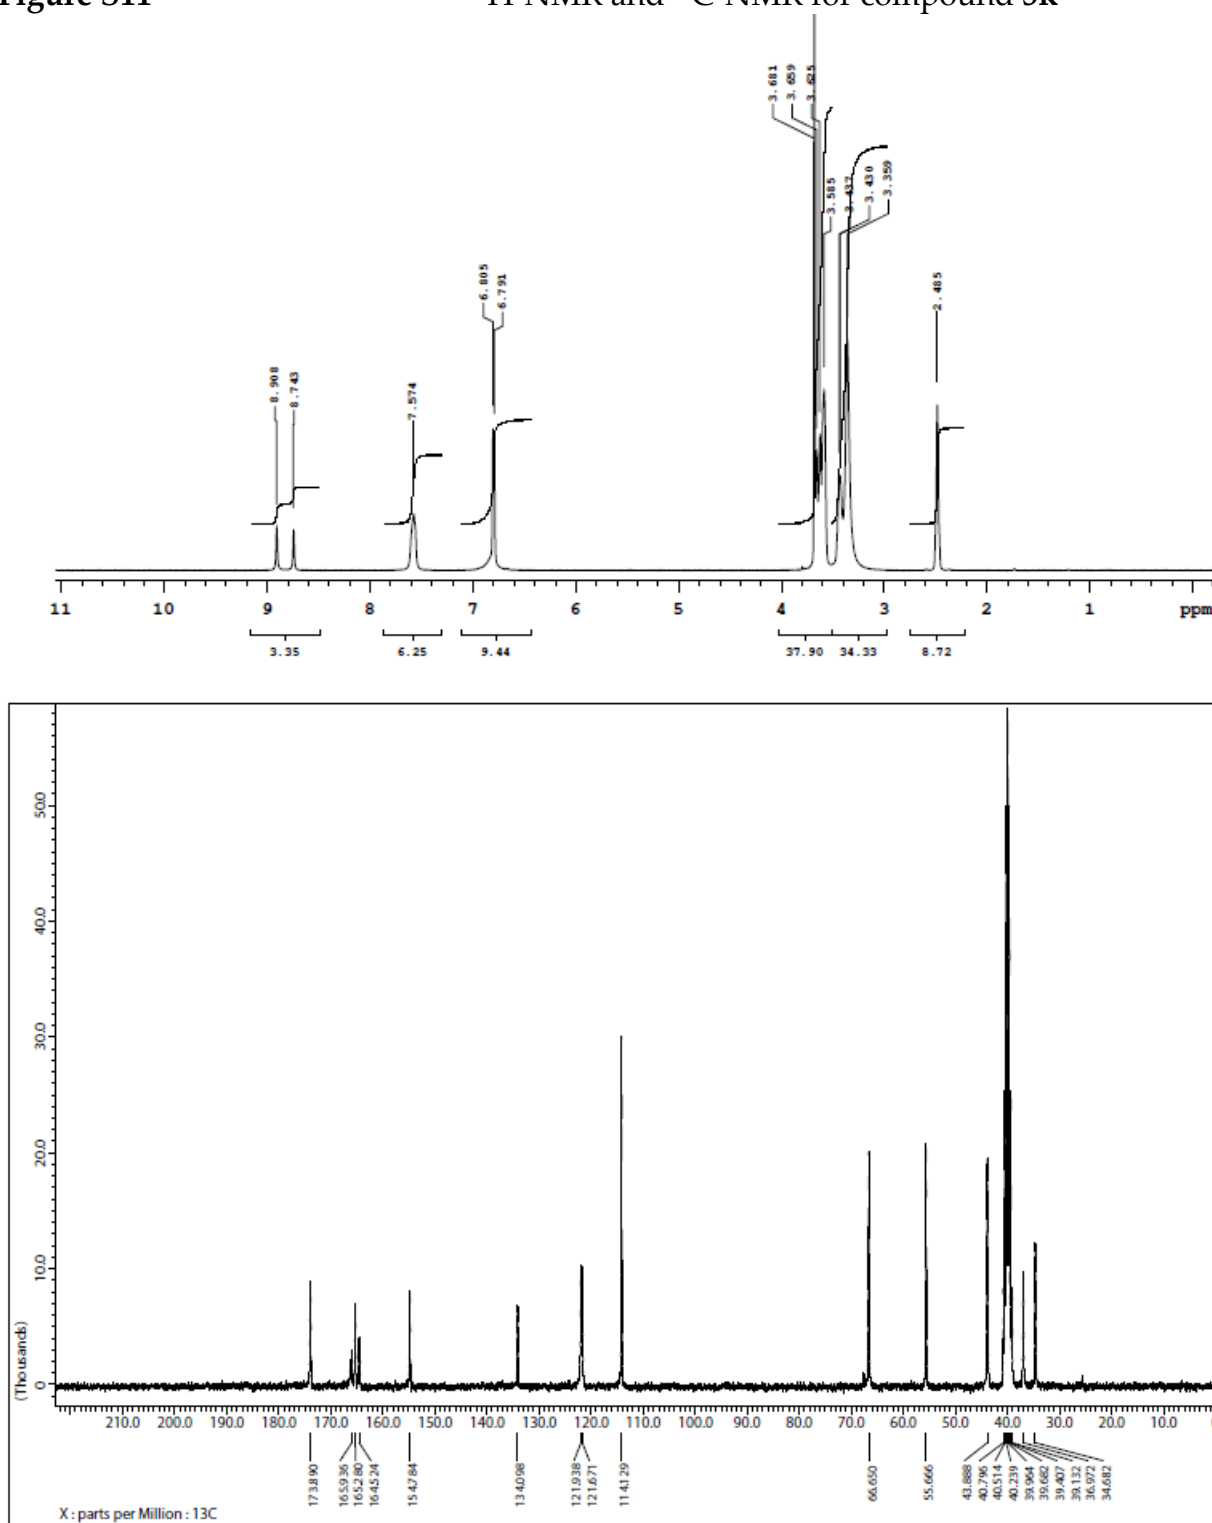

Figure S12

$^1\text{H}$ -NMR and  $^{13}\text{C}$ -NMR for compound 51

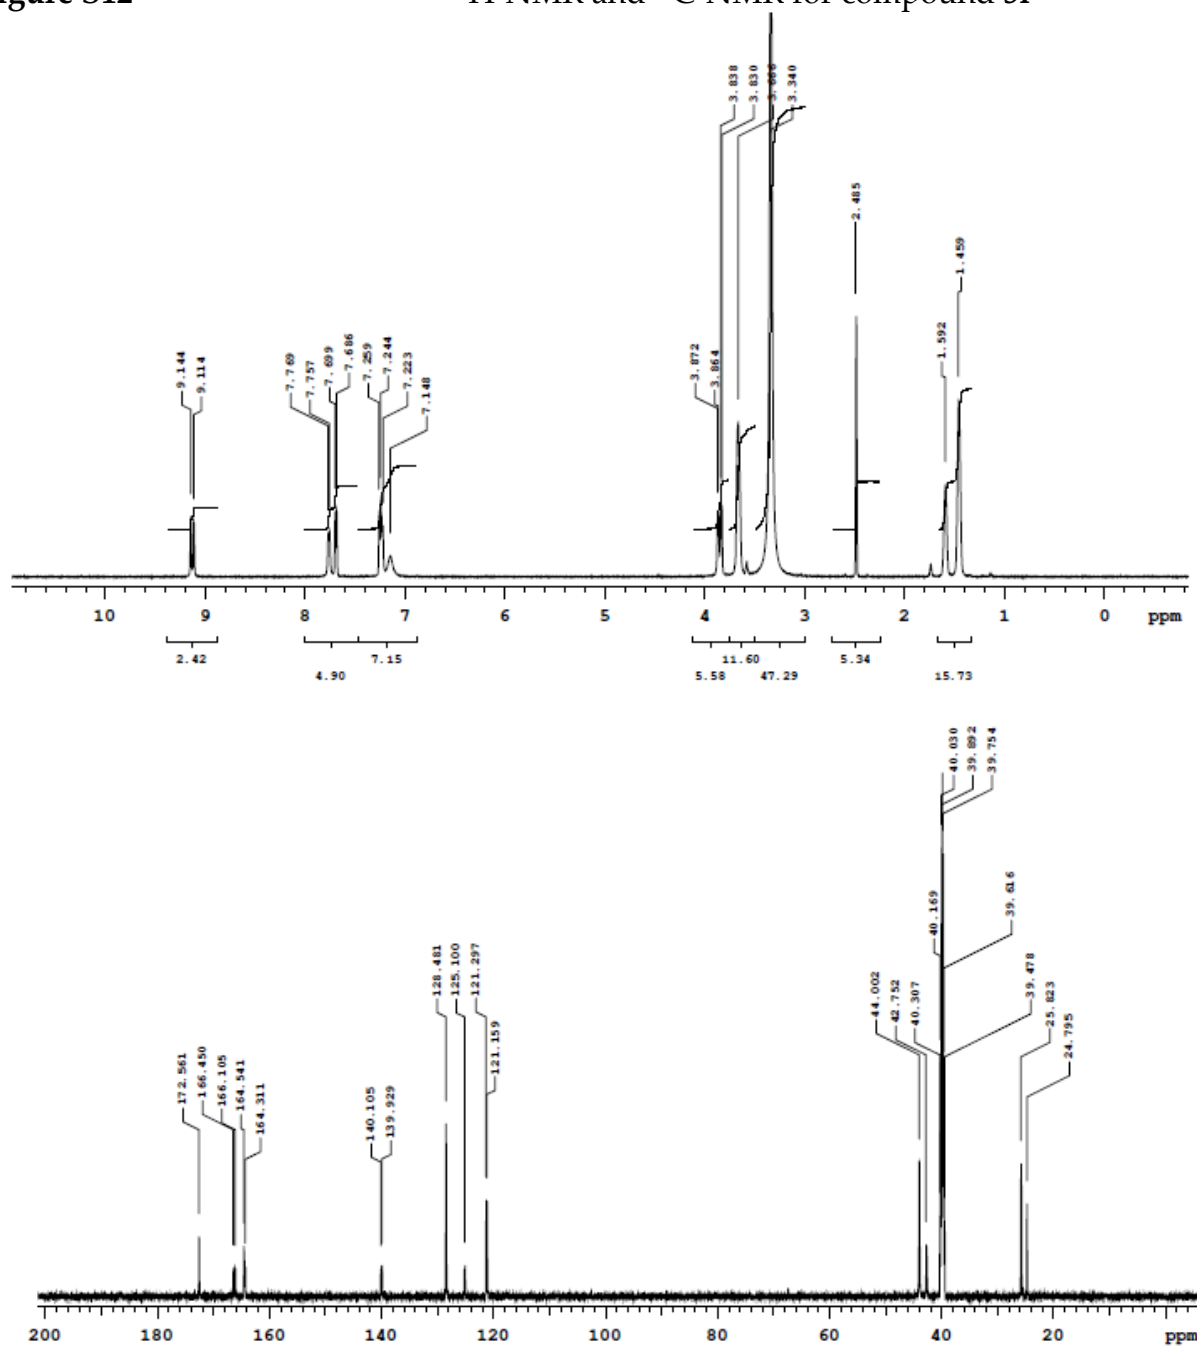

Figure S13

$^1\text{H}$ -NMR and  $^{13}\text{C}$ -NMR for compound **5m**

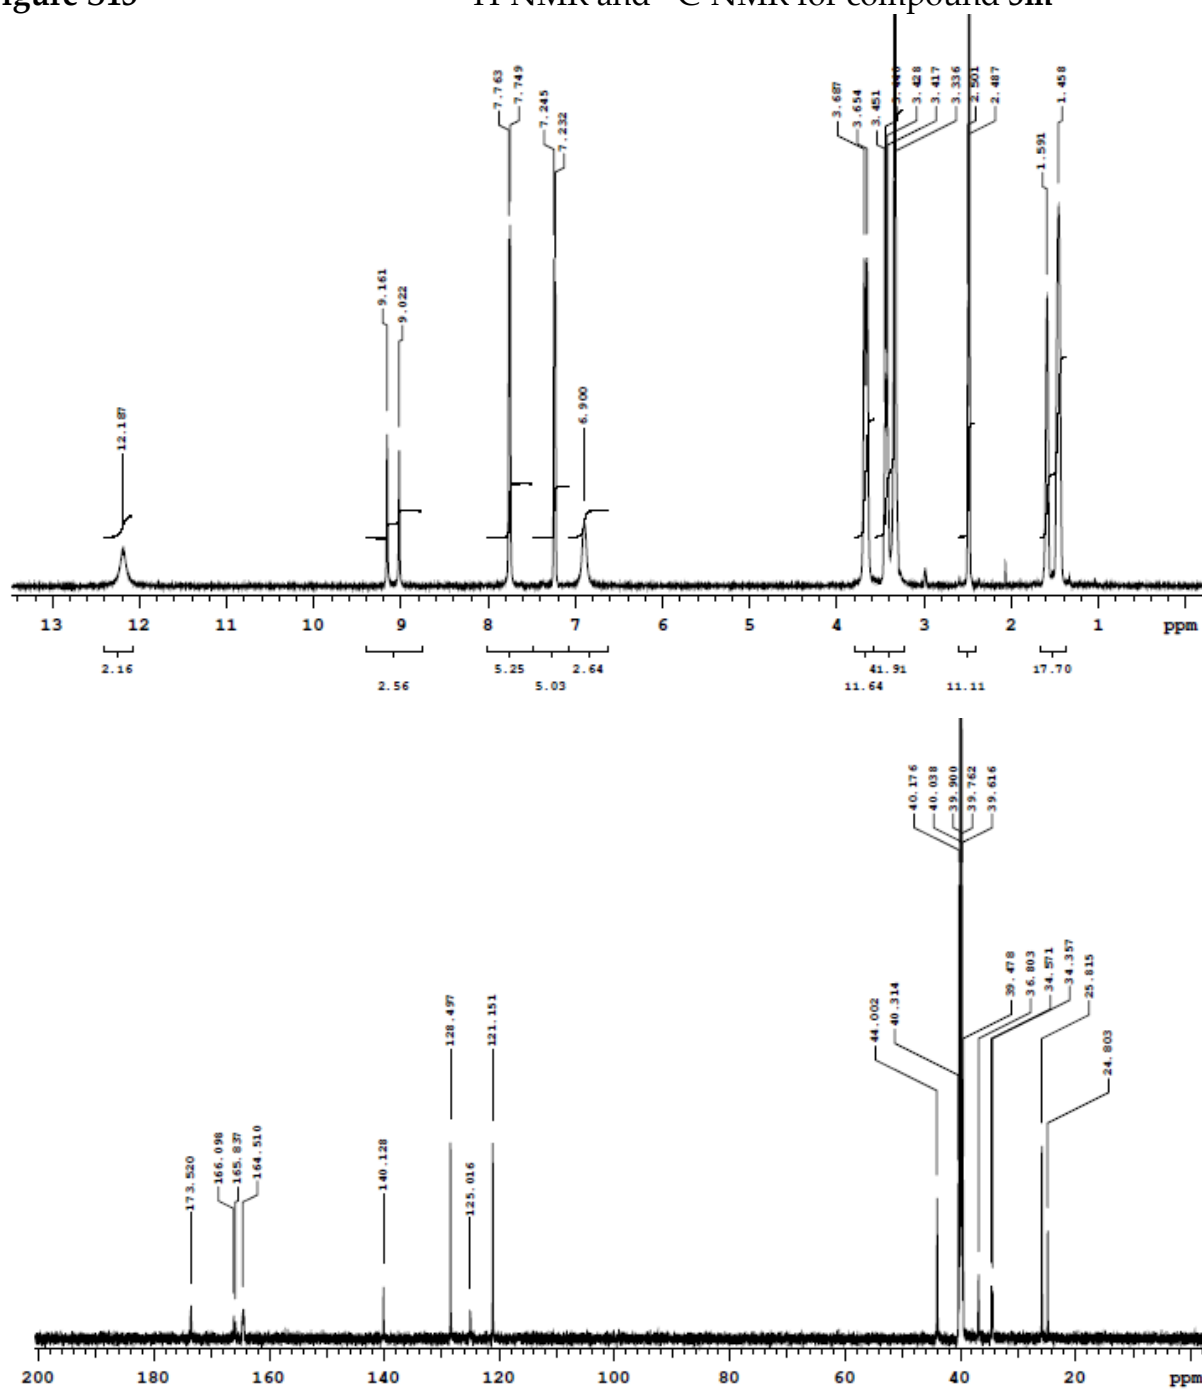

Figure S14

$^1\text{H}$ -NMR and  $^{13}\text{C}$ -NMR for compound **5n**

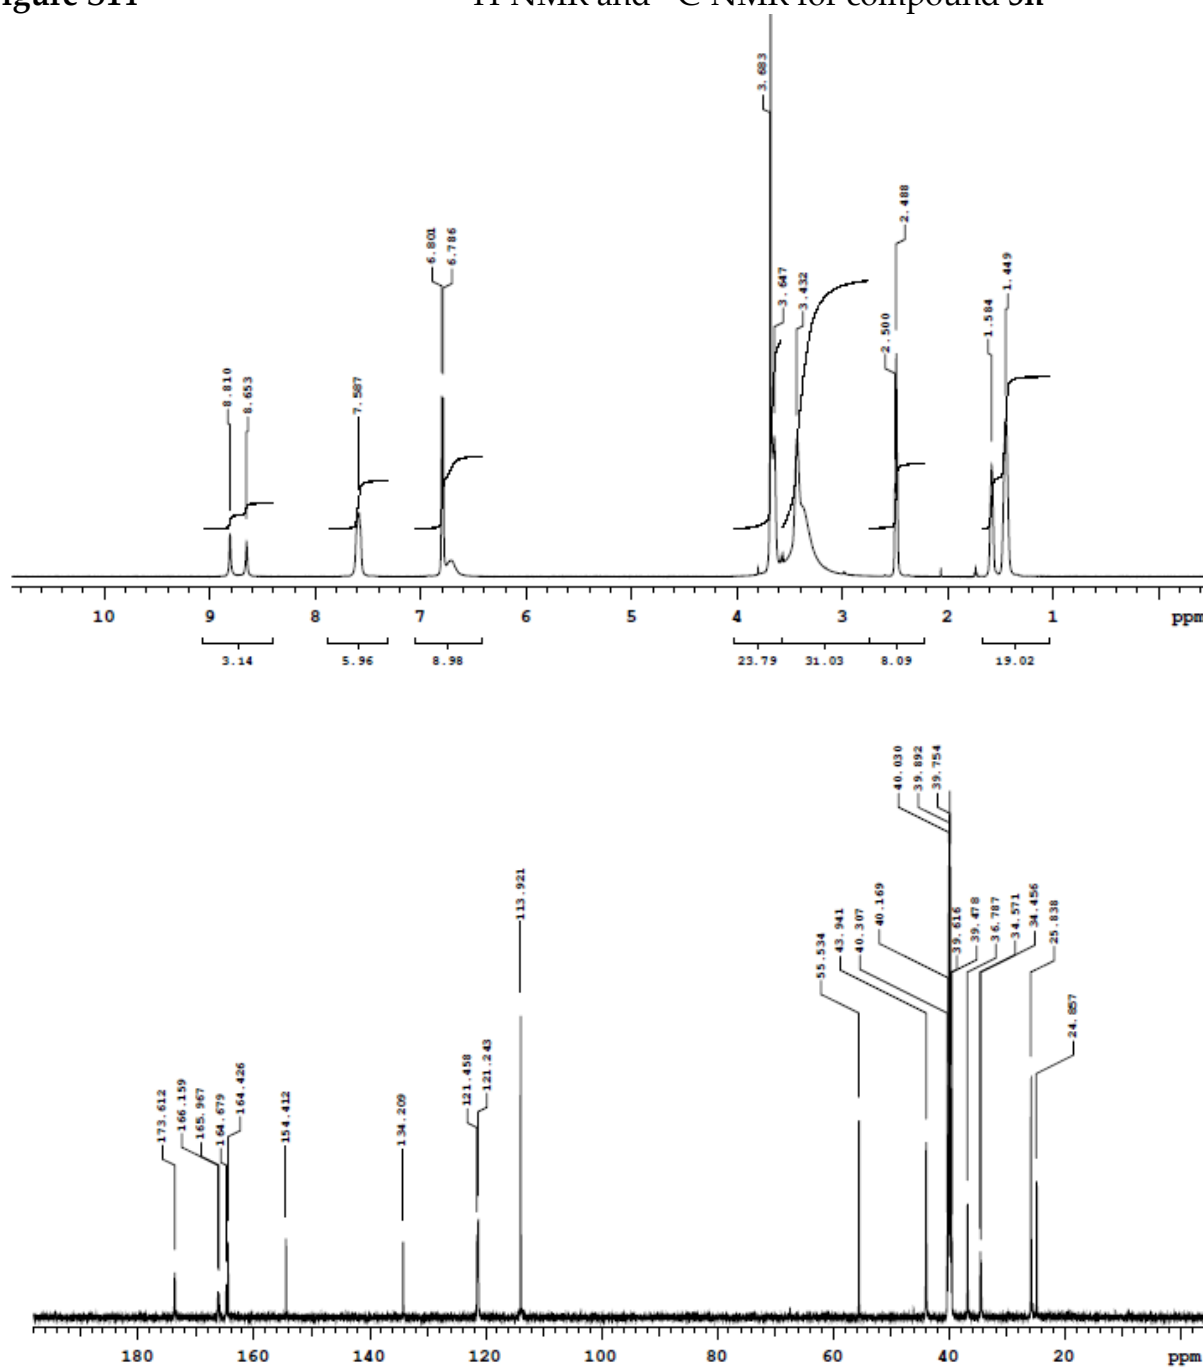

Figure S15

$^1\text{H}$ -NMR and  $^{13}\text{C}$ -NMR for compound **50**

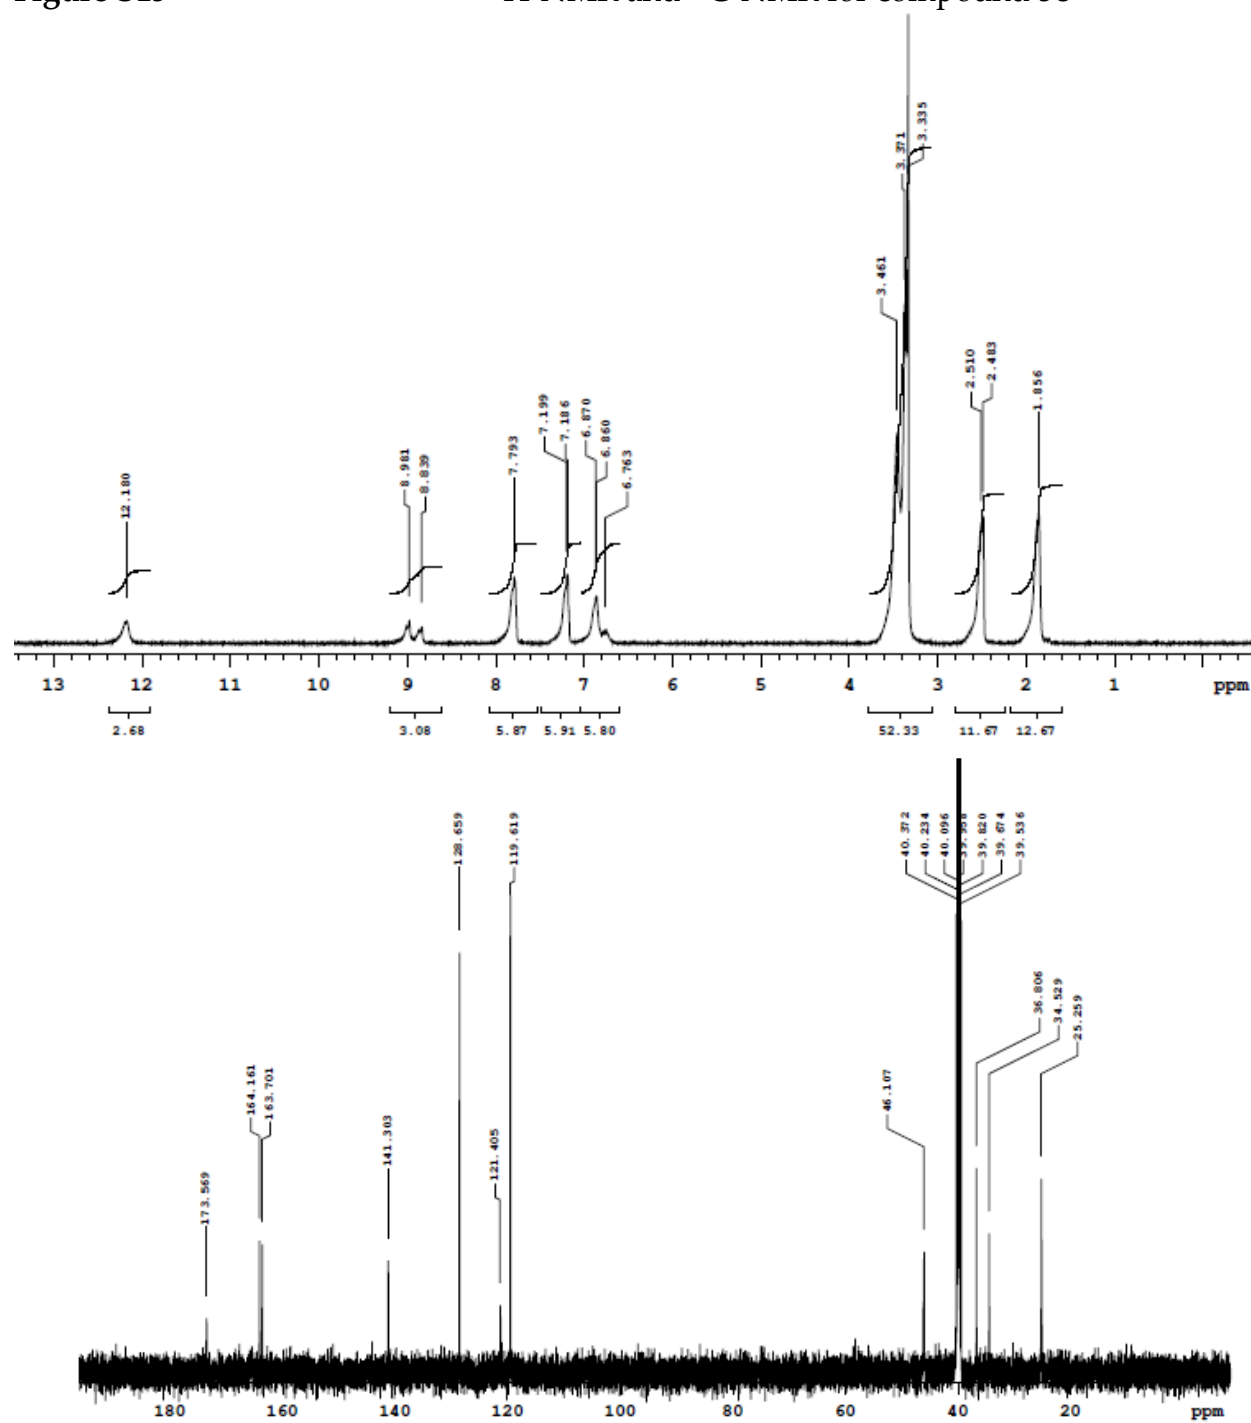



Figure S16

$^1\text{H}$ -NMR and  $^{13}\text{C}$ -NMR for compound **5p**

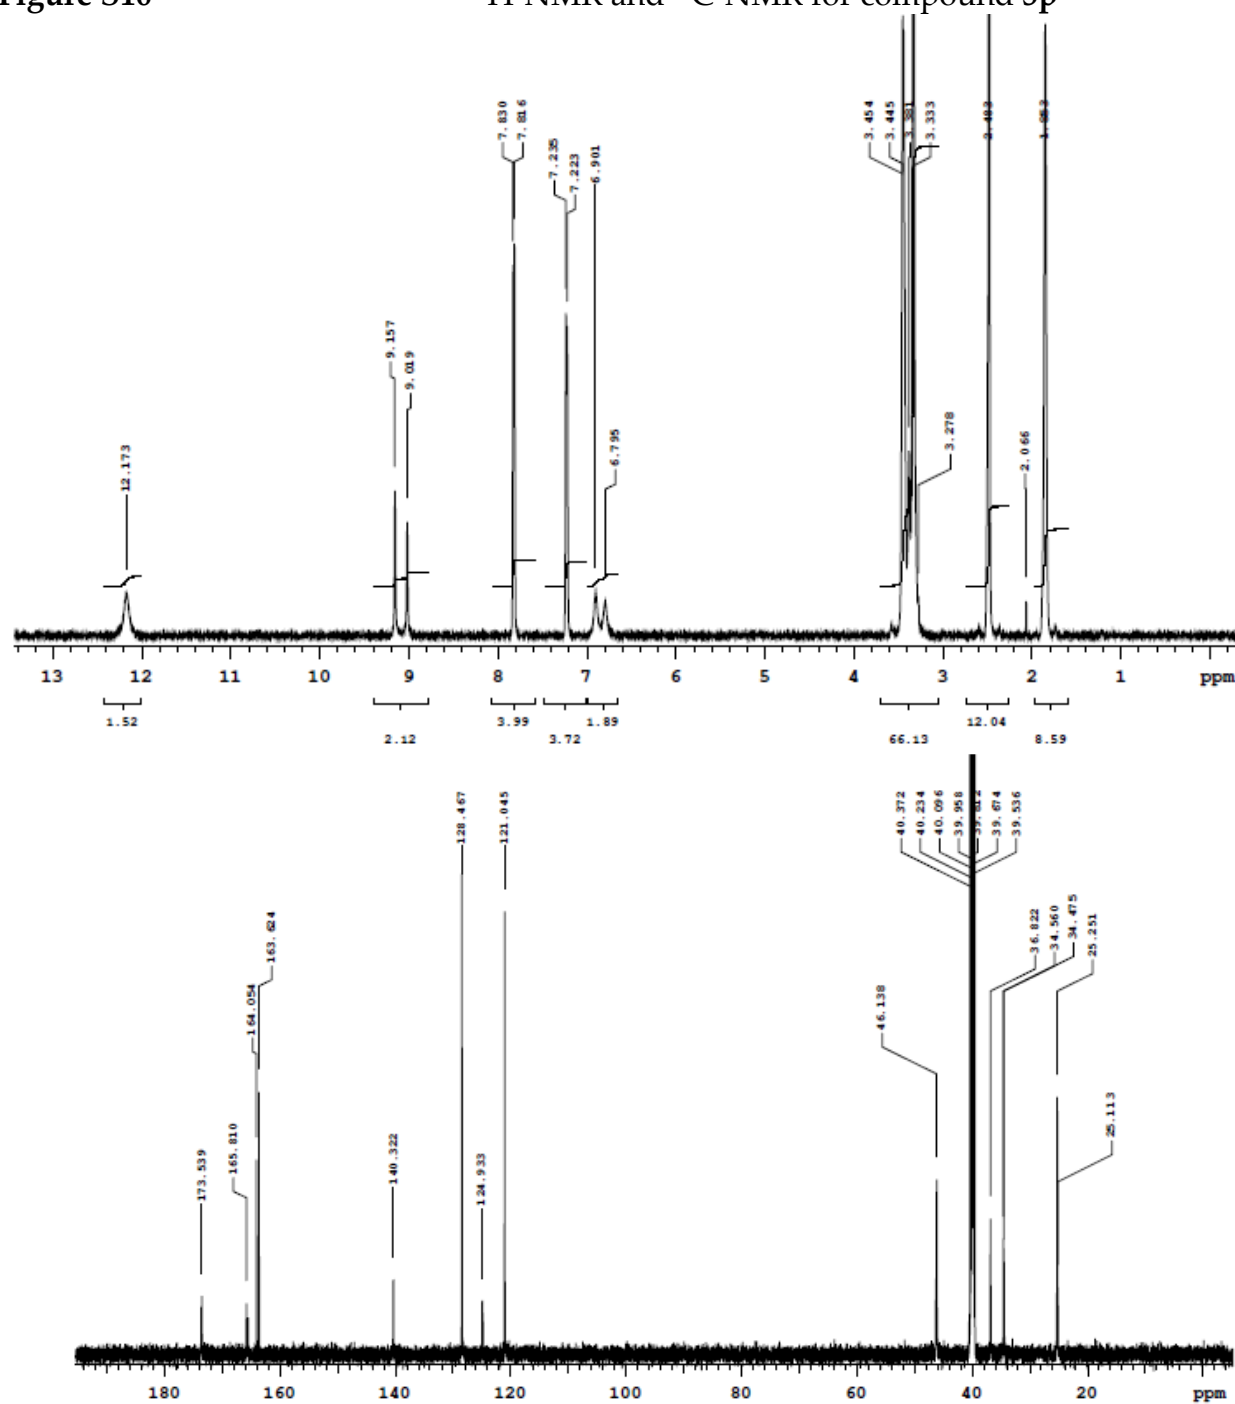

Figure S17

$^1\text{H}$ -NMR and  $^{13}\text{C}$ -NMR for compound **5q**

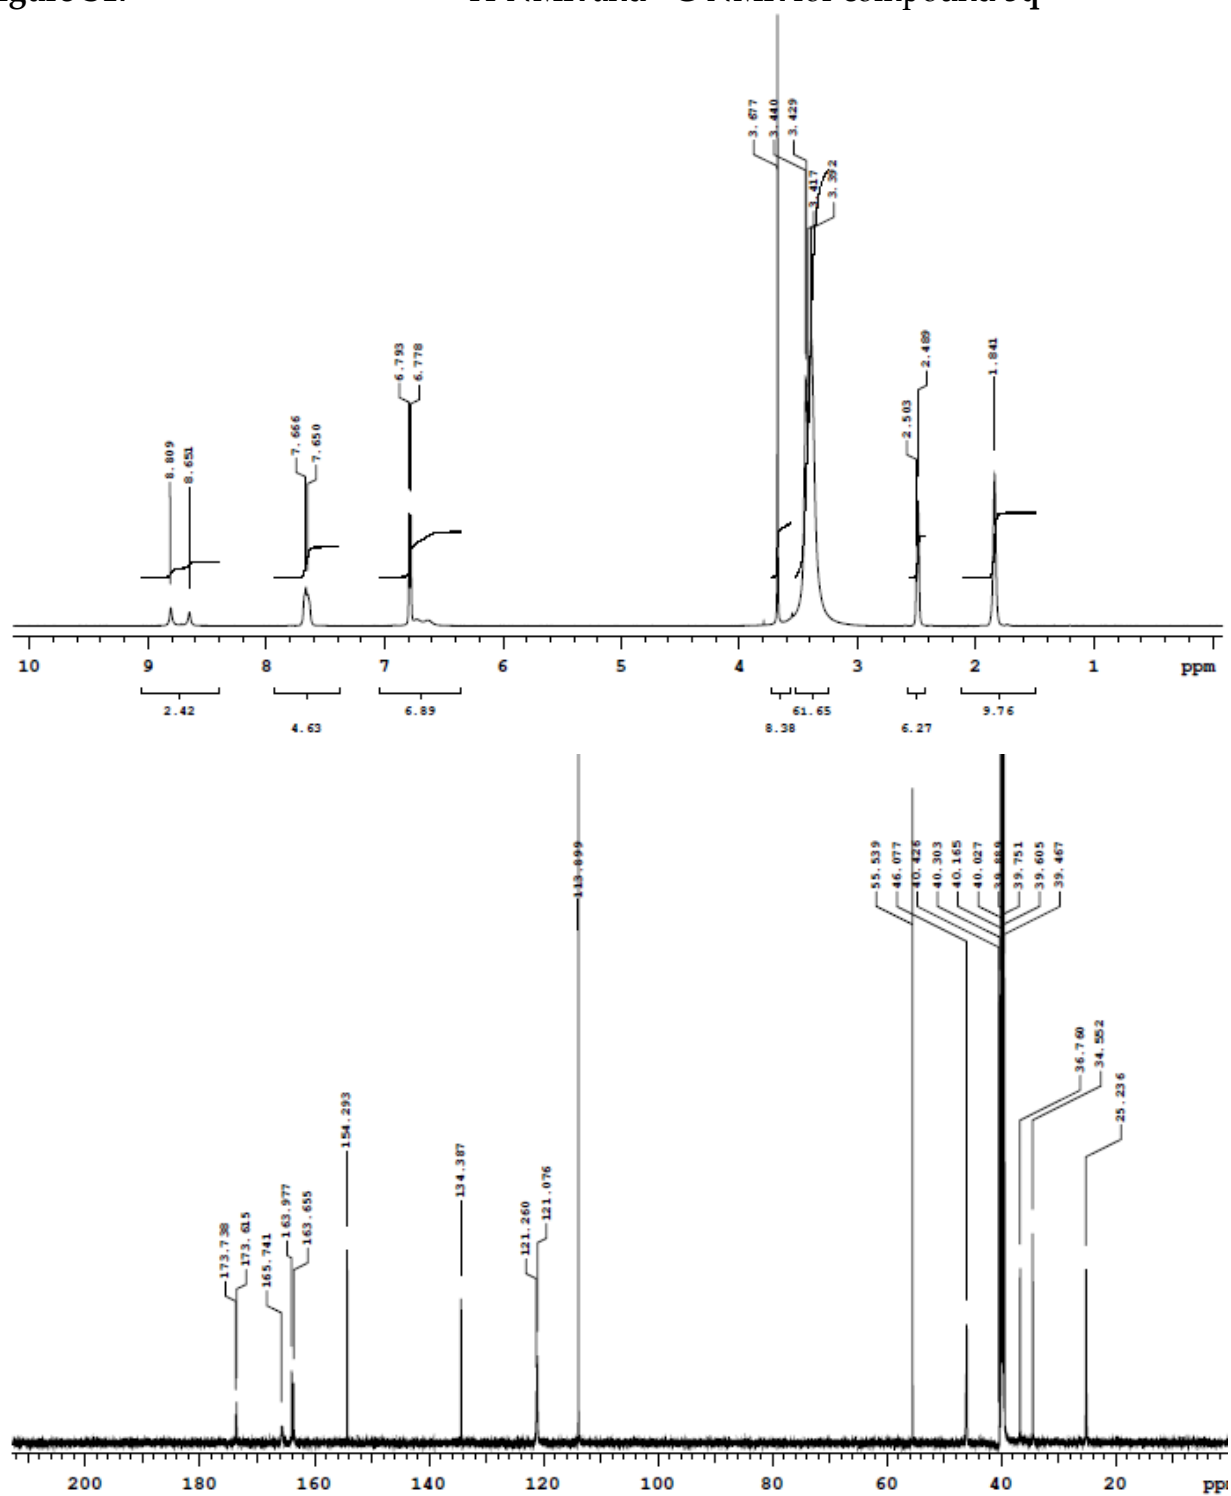

Supplement: s1 [file s1]
